# Supplementary material for: The need for more research into reproductive health and disease
Source: eLife. 2022 Dec 13;11:e75061. doi: 10.7554/eLife.75061 (PMC9771341; doi:10.7554/eLife.75061)
Supplement: Figure 1—source data 1. [file elife-75061-fig1-data1.xlsx]

## Sheet: Total
Year

## Sheet: Not_Disease
Year
