# Supplementary material for: The need for more research into reproductive health and disease
Source: eLife. 2022 Dec 13;11:e75061. doi: 10.7554/eLife.75061 (PMC9771341; doi:10.7554/eLife.75061)
Supplement: Figure 2—source data 1. [file elife-75061-fig2-data1.csv]

Organ	Total	Non-Disease Related	Disease Related
Brain	1058995	782040	276955		** method: PubMed keyword search in Title/Abstract from 1966-2021
Heart	851955	536625	315330
Liver	834006	561621	272385
Lung	652797	297977	354820
Kidney	451177	279609	171568
Intestine	120034	94011	26023
Pancreas	99772	68603	31169
Placenta	57076	47961	9115
Uterus	55971	44579	11392
Testes	32344	28442	3902
Penis	15019	10668	4351
Breast	464629	107077	357552
Ovary	83971	64586	19385
Prostate	197736	43610	154126
