# Supplementary material for: The need for more research into reproductive health and disease
Source: eLife journal article supplement (doi:10.7554/elife.75061), 2022-12-13
Supplement: supp [file Funding_Aug2022.xlsx]

## Sheet: Sheet1
CIHR
Keyword	Number of Projects	combined grant amount	Average Grant Funded (CAD)
Brain	1686	659264225	391023		367678
heart	1214	448773387	369665
liver	1597	502213745	314473
lung	526	195227042	371154
Kidney	347	147253037	424360
intestine	128	56894698	444490
pancreas	96	47162280	491274
placenta	105	38831576	369825
uterus	45	14611030	324690
testes	10	3721096	372110
penis	1	304676	304676
breast	459	154560996	336734
ovary	42	15932644	379349
prostate	143	42761815	299034
Keyword	Number of Projects	Total	Average Grant Funded (USD)
Brain	81666	36026855864	441149
heart	43833	21565530825	491993
liver	22072	10026772684	454276
lung	34492	18130067521	525631
Kidney	21176	10775472987	508853
intestine	5800	2156015968	371727
pancreas	8649	4176612037	482901
placenta	2169	1141211763	526147
uterus	1356	690543184	509250
testes	340	170054360	500160
penis	323	119327331	369434
breast	19132	10046867255	525134
ovary	4814	2507152443	520804
prostate	8960	4611159304	514638
